# Supplementary material for: Complexes of Group 2 dications with soft thioether- and selenoether-containing macrocycles
Source: Royal Society of Chemistry journal article supplement (doi:10.1039/c6dt00808a), 2016-01-01
Supplement: c6dt00808a1.pdf [file c6dt00808a1.pdf]

Electronic Supplementary Information

for

**Complexes of Group 2 dications with soft thioether- and selenoether-containing  
macrocycles**

William Levason, David Pugh, Jamie M. Purkis and Gillian Reid\*

Chemistry, University of Southampton, Highfield, Southampton, SO17 1BJ, UK

Table S1 X-ray crystallographic data

| Compound                                                                                            | [Sr(MeCN) <sub>8</sub> ][BAR <sup>F</sup> ] <sub>2</sub>                         | [Ca(18-crown-6)(MeCN) <sub>2</sub> ][BAR <sup>F</sup> ] <sub>2</sub>                           |
|-----------------------------------------------------------------------------------------------------|----------------------------------------------------------------------------------|------------------------------------------------------------------------------------------------|
| Formula                                                                                             | C <sub>80</sub> H <sub>48</sub> B <sub>2</sub> F <sub>48</sub> N <sub>8</sub> Sr | C <sub>80</sub> H <sub>54</sub> B <sub>2</sub> CaF <sub>48</sub> N <sub>2</sub> O <sub>6</sub> |
| <i>M</i> /g mol <sup>-1</sup>                                                                       | 2142.50                                                                          | 2112.95                                                                                        |
| Crystal system                                                                                      | tetragonal                                                                       | monoclinic                                                                                     |
| Space group (No.)                                                                                   | <i>P</i> 4/ <i>nnc</i> (126)                                                     | <i>C</i> 2/ <i>c</i> (15)                                                                      |
| <i>a</i> /Å                                                                                         | 15.892(3)                                                                        | 18.707(3)                                                                                      |
| <i>b</i> /Å                                                                                         | 15.892(3)                                                                        | 18.139(3)                                                                                      |
| <i>c</i> /Å                                                                                         | 18.290(4)                                                                        | 25.768(4)                                                                                      |
| <i>α</i> /°                                                                                         | 90                                                                               | 90                                                                                             |
| <i>β</i> /°                                                                                         | 90                                                                               | 97.207(4)                                                                                      |
| <i>γ</i> /°                                                                                         | 90                                                                               | 90                                                                                             |
| <i>U</i> /Å <sup>3</sup>                                                                            | 4619(2)                                                                          | 8675(3)                                                                                        |
| <i>Z</i>                                                                                            | 2                                                                                | 4                                                                                              |
| <i>μ</i> (Mo-K $\alpha$ )/mm <sup>-1</sup>                                                          | 0.727                                                                            | 0.229                                                                                          |
| <i>F</i> (000)                                                                                      | 2128                                                                             | 4232                                                                                           |
| Total reflections                                                                                   | 31835                                                                            | 29936                                                                                          |
| Unique reflections                                                                                  | 2053                                                                             | 9892                                                                                           |
| <i>R</i> <sub>int</sub>                                                                             | 0.120                                                                            | 0.056                                                                                          |
| Goodness-of-fit on <i>F</i> <sup>2</sup>                                                            | 1.024                                                                            | 1.048                                                                                          |
| <i>R</i> <sub>1</sub> <sup>b</sup> [ <i>I</i> <sub>o</sub> > 2 $\sigma$ ( <i>I</i> <sub>o</sub> )]  | 0.077                                                                            | 0.077                                                                                          |
| <i>R</i> <sub>1</sub> (all data)                                                                    | 0.106                                                                            | 0.130                                                                                          |
| <i>wR</i> <sub>2</sub> <sup>b</sup> [ <i>I</i> <sub>o</sub> > 2 $\sigma$ ( <i>I</i> <sub>o</sub> )] | 0.198                                                                            | 0.201                                                                                          |
| <i>wR</i> <sub>2</sub> (all data)                                                                   | 0.218                                                                            | 0.236                                                                                          |

Common items: T = 100 K,  $\lambda_1 = 0.71073$  Å (Mo K $\alpha$ ),  $\theta_{\max} = 27.5^\circ$ ,  $R_1 = \Sigma||F_o| - |F_c||/\Sigma|F_o|$ ,  $wR_2 = [\Sigma w(F_o^2 - F_c^2)^2/\Sigma wF_o^2]^{1/2}$ .

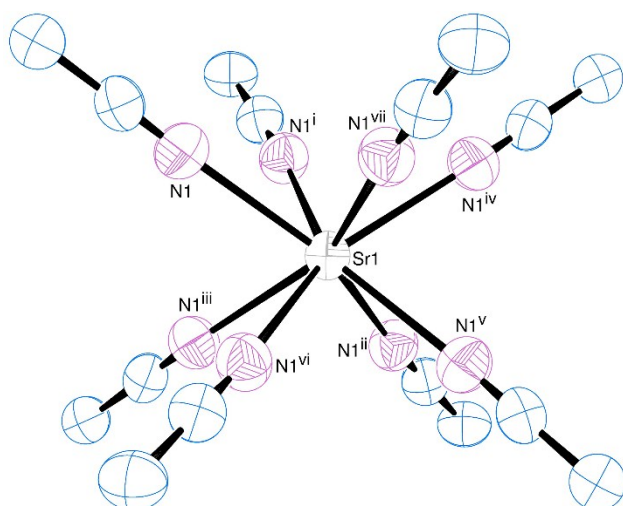

Figure S1. ORTEP representation of the  $[\text{Sr}(\text{MeCN})_8]^{2+}$  dication. Ellipsoids are shown at the 50% probability level and hydrogen atoms are omitted for clarity.  $d(\text{Sr}-\text{N}) = 2.681(5)$  Å. Symmetry operations: (i)  $1.5 - y, 1.5 - x, 0.5 - z$ ; (ii)  $x, 1.5 - y, 0.5 - z$ ; (iii)  $y, 1.5 - x, z$ ; (iv)  $1.5 - x, 1.5 - y, z$ ; (v)  $y, x, 0.5 - z$ ; (vi)  $1.5 - y, x, z$ ; (vii)  $1.5 - x, y, 0.5 - z$ .

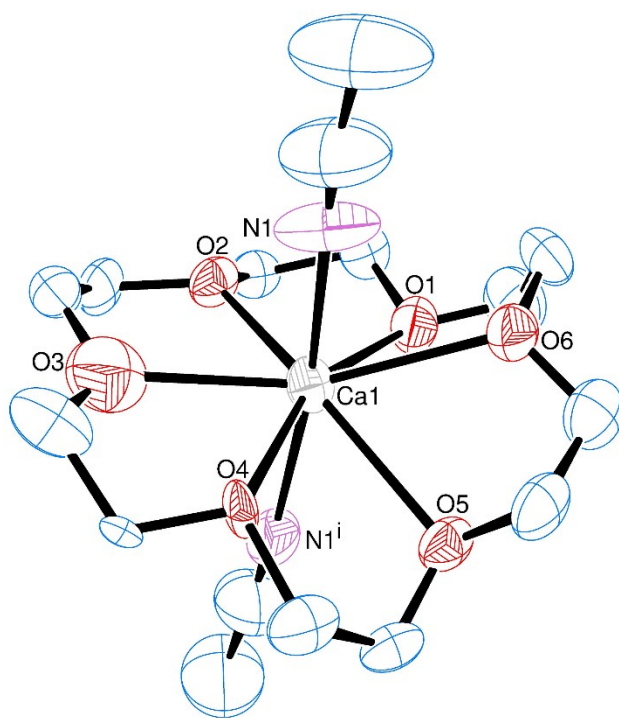

Figure S2. ORTEP representation of the dication in  $[\text{Ca}(\text{18-crown-6})(\text{MeCN})_2][\text{BARF}]_2$ . Hydrogen atoms are omitted for clarity and ellipsoids are shown at the 50% probability level. Selected bond lengths (Å) and angles ( $^\circ$ ): Ca–O1 2.529(6), Ca–O2 2.377(5), Ca–O3 2.50(2), Ca–O4 2.490(8), Ca–O5 2.605(5), Ca–O6 2.550(5), Ca–N1 2.423(4); O1–Ca–O2 65.8(2), O2–Ca–O3 67.1(5), O3–Ca–O4 63.3(3), O4–Ca–O5 63.9(3), O5–Ca–O6 62.0(2), O6–Ca–O1 65.1(2). Symmetry operation:  $-x, y, 0.5 - z$ .
